# Supplementary material for: Pressure-varying Langmuir parameters and stepped nitrogen adsorption on alumina and silica
Source: Royal Society of Chemistry journal article supplement (doi:10.1039/c8cp06163g), 2019-01-01
Supplement: c8cp06163g1.pdf [file c8cp06163g1.pdf]

Cite this: DOI: 10.1039/xxxxxxxxxx

## Pressure-varying Langmuir parameters and stepped nitrogen adsorption on alumina and silica<sup>†</sup>

Trevor C. Brown,<sup>\*a</sup> David J. Miron,<sup>b</sup> and Christopher M. Fellows<sup>a</sup>

Received Date

Accepted Date

DOI: 10.1039/xxxxxxxxxx

[www.rsc.org/journalname](http://www.rsc.org/journalname)

### Supporting Information

#### Pressure-varying Langmuir simulations

Langmuir maximum adsorption capacities,  $N_{L,\infty}(p)$ , equilibrium adsorption coefficients,  $K_L(p)$  and cost functions,  $C(p, b_l(p), \mu)$  at each measured surface excess amount and pressure for each of the four adsorbents are listed in four tables.

### References

- 1 J. Čejka, N. Zilkova, J. Rathousky, A. Zukal and J. Jagiello, *Langmuir*, 2004, **20**, 7532–7539.
- 2 J. Čejka and A. Zukal, Personal communication: adsorption data, June 2016.
- 3 M. Jaroniec, M. Kruk and J. Olivier, *Langmuir*, 1999, **15**, 5410–5413.
- 4 M. Kruk, V. Antochshuk and M. Jaroniec, *J. Phys. Chem. B*, 1999, **103**, 10670–10678.

<sup>a</sup> School of Science and Technology, University of New England, Armidale, New South Wales 2351, Australia. E-mail: Trevor.Brown@une.edu.au

<sup>b</sup> Office of Deputy Vice Chancellor (Research), University of New England, Armidale, NSW 2351, Australia.

**Table 1** Pressure-varying Langmuir parameters and estimation for the maximum adsorption capacity,  $N_{L,\infty}(p)$  cost function,  $C(p, b_l(p), \mu)$  at each relative pressure for  $N_2$  adsorption on  $\alpha$ -alumina (AA).<sup>1,2</sup> Within each curly brace is the Bayesian Change Point (BCP) probabilities for each maximum adsorption capacity,  $N_{L,\infty}(p)$  and Langmuir equilibrium adsorption coefficient,  $K_L(p)$ .

| $p/p_s$              | $N_{L,\infty}(p)$<br>( $\mu\text{mol m}^{-2}$ ) | $K_L(p)$      | $C(p, b_l(p), \mu)$   | $p/p_s$ | $N_{L,\infty}(p)$<br>( $\mu\text{mol m}^{-2}$ ) | $K_L(p)$      | $C(p, b_l(p), \mu)$   |
|----------------------|-------------------------------------------------|---------------|-----------------------|---------|-------------------------------------------------|---------------|-----------------------|
| $7.1 \times 10^{-4}$ | 4.637 {0.01}                                    | 4559 {0.182}  | $2.14 \times 10^{-5}$ | 0.102   | 15.29 {0.012}                                   | 18.24 {0.708} | $3.22 \times 10^{-3}$ |
| $1.0 \times 10^{-3}$ | 4.946 {0.04}                                    | 3289 {0.0}    | $2.81 \times 10^{-5}$ | 0.113   | 15.85 {0.004}                                   | 16.38 {0.006} | $3.52 \times 10^{-3}$ |
| $1.4 \times 10^{-3}$ | 5.241 {0.02}                                    | 2438 {0.024}  | $3.56 \times 10^{-5}$ | 0.125   | 16.50 {0.098}                                   | 14.60 {0.0}   | $3.77 \times 10^{-3}$ |
| $1.9 \times 10^{-3}$ | 5.467 {0.006}                                   | 1927 {0.01}   | $4.71 \times 10^{-5}$ | 0.139   | 16.97 {0.016}                                   | 13.44 {0.0}   | $3.99 \times 10^{-3}$ |
| $2.4 \times 10^{-3}$ | 5.651 {0.002}                                   | 1588 {0.606}  | $5.95 \times 10^{-5}$ | 0.155   | 17.33 {0.02}                                    | 12.63 {0.0}   | $4.21 \times 10^{-3}$ |
| $3.2 \times 10^{-3}$ | 5.987 {0.0}                                     | 1163 {0.376}  | $7.99 \times 10^{-5}$ | 0.172   | 17.62 {0.006}                                   | 12.02 {0.0}   | $4.43 \times 10^{-3}$ |
| $4.1 \times 10^{-3}$ | 6.217 {0.0}                                     | 937.7 {0.016} | $9.71 \times 10^{-5}$ | 0.190   | 18.09 {0.0}                                     | 11.11 {0.0}   | $4.73 \times 10^{-3}$ |
| $5.3 \times 10^{-3}$ | 6.335 {0.0}                                     | 824.5 {0.0}   | $1.15 \times 10^{-4}$ | 0.210   | 18.96 {0.002}                                   | 9.620 {0.0}   | $5.31 \times 10^{-3}$ |
| $6.6 \times 10^{-3}$ | 6.498 {0.0}                                     | 698.5 {0.0}   | $1.48 \times 10^{-4}$ | 0.230   | 19.94 {0.002}                                   | 8.277 {0.0}   | $5.88 \times 10^{-3}$ |
| $8.0 \times 10^{-3}$ | 6.662 {0.0}                                     | 596.3 {0.004} | $1.82 \times 10^{-4}$ | 0.250   | 20.56 {0.04}                                    | 7.574 {0.0}   | $6.32 \times 10^{-3}$ |
| $9.6 \times 10^{-3}$ | 6.892 {0.006}                                   | 484.5 {0.0}   | $2.36 \times 10^{-4}$ | 0.270   | 21.40 {0.332}                                   | 6.757 {0.0}   | $6.75 \times 10^{-3}$ |
| 0.011                | 7.093 {0.02}                                    | 410.0 {0.0}   | $2.74 \times 10^{-4}$ | 0.290   | 22.00 {0.098}                                   | 6.255 {0.0}   | $7.14 \times 10^{-3}$ |
| 0.013                | 7.707 {0.91}                                    | 267.9 {0.0}   | $3.18 \times 10^{-4}$ | 0.310   | 22.89 {0.226}                                   | 5.609 {0.0}   | $7.63 \times 10^{-3}$ |
| 0.016                | 8.197 {0.068}                                   | 201.1 {0.456} | $3.81 \times 10^{-4}$ | 0.330   | 24.05 {0.162}                                   | 4.920 {0.0}   | $8.25 \times 10^{-3}$ |
| 0.019                | 8.654 {0.0}                                     | 157.8 {0.548} | $5.01 \times 10^{-4}$ | 0.350   | 25.13 {0.004}                                   | 4.392 {0.18}  | $8.86 \times 10^{-3}$ |
| 0.022                | 9.087 {0.0}                                     | 128.2 {0.0}   | $6.33 \times 10^{-4}$ | 0.370   | 26.12 {0.004}                                   | 3.991 {0.078} | $9.44 \times 10^{-3}$ |
| 0.026                | 9.355 {0.0}                                     | 112.8 {0.0}   | $7.67 \times 10^{-4}$ | 0.390   | 27.35 {0.15}                                    | 3.567 {0.024} | $1.01 \times 10^{-2}$ |
| 0.029                | 9.622 {0.0}                                     | 100.0 {0.0}   | $8.84 \times 10^{-4}$ | 0.410   | 28.66 {0.85}                                    | 3.202 {0.0}   | $1.09 \times 10^{-2}$ |
| 0.033                | 9.834 {0.0}                                     | 91.09 {0.0}   | $9.86 \times 10^{-4}$ | 0.432   | 31.35 {0.002}                                   | 2.625 {0.122} | $1.19 \times 10^{-2}$ |
| 0.038                | 10.05 {0.0}                                     | 83.23 {0.0}   | $1.08 \times 10^{-3}$ | 0.452   | 33.90 {0.0}                                     | 2.235 {0.334} | $1.28 \times 10^{-2}$ |
| 0.043                | 10.24 {0.0}                                     | 76.74 {0.0}   | $1.19 \times 10^{-3}$ | 0.473   | 37.26 {0.004}                                   | 1.860 {0.18}  | $1.39 \times 10^{-2}$ |
| 0.048                | 10.67 {0.002}                                   | 64.60 {0.0}   | $1.37 \times 10^{-3}$ | 0.495   | 40.23 {0.628}                                   | 1.616 {0.092} | $1.50 \times 10^{-2}$ |
| 0.053                | 10.93 {0.0}                                     | 58.56 {0.0}   | $1.50 \times 10^{-3}$ | 0.518   | 44.30 {0.38}                                    | 1.365 {0.0}   | $1.62 \times 10^{-2}$ |
| 0.058                | 11.17 {0.0}                                     | 53.46 {0.0}   | $1.62 \times 10^{-3}$ | 0.541   | 50.11 {0.06}                                    | 1.114 {0.052} | $1.76 \times 10^{-2}$ |
| 0.063                | 11.46 {0.006}                                   | 48.25 {0.0}   | $1.74 \times 10^{-3}$ | 0.564   | 57.08 {0.754}                                   | 0.910 {0.016} | $1.90 \times 10^{-2}$ |
| 0.068                | 11.87 {0.0}                                     | 42.13 {0.0}   | $1.91 \times 10^{-3}$ | 0.588   | 66.55 {0.516}                                   | 0.726 {0.126} | $2.04 \times 10^{-2}$ |
| 0.073                | 12.24 {0.0}                                     | 37.53 {0.0}   | $2.07 \times 10^{-3}$ | 0.613   | 79.12 {0.764}                                   | 0.572 {0.01}  | $2.20 \times 10^{-2}$ |
| 0.078                | 12.67 {0.804}                                   | 33.09 {0.056} | $2.27 \times 10^{-3}$ | 0.638   | 100.9 {0.972}                                   | 0.417 {0.266} | $2.37 \times 10^{-2}$ |
| 0.084                | 14.05 {0.068}                                   | 23.58 {0.0}   | $2.57 \times 10^{-3}$ | 0.663   | 141.2 {—}                                       | 0.277 {—}     | $2.55 \times 10^{-2}$ |
| 0.092                | 14.58 {0.028}                                   | 21.04 {0.242} | $2.89 \times 10^{-3}$ |         |                                                 |               |                       |

**Table 2** Pressure-varying Langmuir parameters and estimation for the maximum adsorption capacity,  $N_{L,\infty}(p)$  cost function,  $C(p, b_l(p), \mu)$  at each relative pressure for  $N_2$  adsorption on Aluminiumoxid C (DC).<sup>1,2</sup> Within each curly brace is the Bayesian Change Point (BCP) probabilities for each maximum adsorption capacity,  $N_{L,\infty}(p)$  and Langmuir equilibrium adsorption coefficient,  $K_L(p)$ .

| $p/p_s$              | $N_{L,\infty}(p)$<br>( $\mu\text{mol m}^{-2}$ ) | $K_L(p)$      | $C(p, b_l(p), \mu)$   | $p/p_s$ | $N_{L,\infty}(p)$<br>( $\mu\text{mol m}^{-2}$ ) | $K_L(p)$      | $C(p, b_l(p), \mu)$   |
|----------------------|-------------------------------------------------|---------------|-----------------------|---------|-------------------------------------------------|---------------|-----------------------|
| $7.1 \times 10^{-4}$ | 6.019 {0.032}                                   | 3758 {0.972}  | $2.35 \times 10^{-5}$ | 0.102   | 13.91 {0.008}                                   | 34.84 {0.058} | $1.76 \times 10^{-3}$ |
| $1.0 \times 10^{-3}$ | 6.577 {0.022}                                   | 2603 {0.002}  | $2.95 \times 10^{-5}$ | 0.113   | 14.36 {0.006}                                   | 30.09 {0.0}   | $1.97 \times 10^{-3}$ |
| $1.4 \times 10^{-3}$ | 6.791 {0.01}                                    | 2184 {0.0}    | $3.58 \times 10^{-5}$ | 0.125   | 14.79 {0.008}                                   | 26.37 {0.0}   | $2.17 \times 10^{-3}$ |
| $1.9 \times 10^{-3}$ | 6.982 {0.008}                                   | 1853 {0.0}    | $4.54 \times 10^{-5}$ | 0.139   | 15.23 {0.012}                                   | 23.28 {0.0}   | $2.40 \times 10^{-3}$ |
| $2.4 \times 10^{-3}$ | 7.147 {0.01}                                    | 1603 {0.046}  | $5.46 \times 10^{-5}$ | 0.155   | 15.67 {0.026}                                   | 20.63 {0.0}   | $2.65 \times 10^{-3}$ |
| $3.2 \times 10^{-3}$ | 7.580 {0.012}                                   | 1172 {0.746}  | $6.83 \times 10^{-5}$ | 0.172   | 16.10 {0.06}                                    | 18.43 {0.002} | $2.93 \times 10^{-3}$ |
| $4.1 \times 10^{-3}$ | 7.858 {0.004}                                   | 952.6 {0.21}  | $8.00 \times 10^{-5}$ | 0.190   | 16.53 {0.0}                                     | 16.58 {0.0}   | $3.30 \times 10^{-3}$ |
| $5.3 \times 10^{-3}$ | 8.075 {0.006}                                   | 805.3 {0.004} | $9.28 \times 10^{-5}$ | 0.210   | 17.50 {0.08}                                    | 13.23 {0.086} | $4.02 \times 10^{-3}$ |
| $6.6 \times 10^{-3}$ | 8.278 {0.002}                                   | 686.0 {0.0}   | $1.13 \times 10^{-4}$ | 0.230   | 18.50 {0.026}                                   | 10.83 {0.492} | $4.73 \times 10^{-3}$ |
| $8.0 \times 10^{-3}$ | 8.465 {0.0}                                     | 592.6 {0.0}   | $1.40 \times 10^{-4}$ | 0.250   | 19.51 {0.064}                                   | 9.049 {0.134} | $5.43 \times 10^{-3}$ |
| $9.6 \times 10^{-3}$ | 8.676 {0.008}                                   | 505.7 {0.0}   | $1.75 \times 10^{-4}$ | 0.270   | 20.55 {0.596}                                   | 7.685 {0.0}   | $6.14 \times 10^{-3}$ |
| 0.011                | 8.864 {0.048}                                   | 440.9 {0.002} | $2.10 \times 10^{-4}$ | 0.290   | 21.63 {0.196}                                   | 6.593 {0.0}   | $6.84 \times 10^{-3}$ |
| 0.013                | 9.393 {0.336}                                   | 316.5 {0.0}   | $2.45 \times 10^{-4}$ | 0.310   | 22.71 {0.064}                                   | 5.746 {0.256} | $7.52 \times 10^{-3}$ |
| 0.016                | 9.713 {0.574}                                   | 262.0 {0.748} | $2.86 \times 10^{-4}$ | 0.330   | 23.84 {0.0}                                     | 5.040 {0.0}   | $8.21 \times 10^{-3}$ |
| 0.019                | 10.03 {0.004}                                   | 218.5 {0.302} | $3.53 \times 10^{-4}$ | 0.350   | 24.96 {0.072}                                   | 4.468 {0.03}  | $8.88 \times 10^{-3}$ |
| 0.022                | 10.28 {0.022}                                   | 190.5 {0.008} | $4.16 \times 10^{-4}$ | 0.370   | 26.77 {0.058}                                   | 3.763 {0.0}   | $9.67 \times 10^{-3}$ |
| 0.026                | 10.48 {0.006}                                   | 169.5 {0.002} | $4.74 \times 10^{-4}$ | 0.390   | 28.09 {0.002}                                   | 3.361 {0.008} | $1.04 \times 10^{-2}$ |
| 0.029                | 10.66 {0.004}                                   | 153.3 {0.0}   | $5.28 \times 10^{-4}$ | 0.410   | 29.30 {0.03}                                    | 3.055 {0.0}   | $1.11 \times 10^{-2}$ |
| 0.033                | 10.82 {0.002}                                   | 140.3 {0.0}   | $5.79 \times 10^{-4}$ | 0.432   | 31.03 {0.036}                                   | 2.692 {0.0}   | $1.19 \times 10^{-2}$ |
| 0.038                | 10.97 {0.0}                                     | 129.6 {0.0}   | $6.30 \times 10^{-4}$ | 0.452   | 33.05 {0.824}                                   | 2.357 {0.0}   | $1.27 \times 10^{-2}$ |
| 0.043                | 11.11 {0.002}                                   | 120.4 {0.0}   | $6.91 \times 10^{-4}$ | 0.473   | 35.53 {0.144}                                   | 2.038 {0.0}   | $1.36 \times 10^{-2}$ |
| 0.048                | 11.36 {0.002}                                   | 105.0 {0.0}   | $7.91 \times 10^{-4}$ | 0.495   | 38.38 {0.032}                                   | 1.758 {0.0}   | $1.45 \times 10^{-2}$ |
| 0.053                | 11.58 {0.0}                                     | 93.35 {0.0}   | $8.84 \times 10^{-4}$ | 0.518   | 41.81 {0.01}                                    | 1.505 {0.0}   | $1.55 \times 10^{-2}$ |
| 0.058                | 11.78 {0.0}                                     | 84.34 {0.0}   | $9.71 \times 10^{-4}$ | 0.541   | 46.24 {0.014}                                   | 1.265 {0.0}   | $1.66 \times 10^{-2}$ |
| 0.063                | 11.98 {0.0}                                     | 76.51 {0.0}   | $1.06 \times 10^{-3}$ | 0.564   | 50.10 {0.998}                                   | 1.109 {0.07}  | $1.77 \times 10^{-2}$ |
| 0.068                | 12.15 {0.0002}                                  | 70.46 {0.0}   | $1.14 \times 10^{-3}$ | 0.588   | 57.85 {0.322}                                   | 0.885 {0.932} | $1.92 \times 10^{-2}$ |
| 0.073                | 12.31 {0.002}                                   | 65.51 {0.0}   | $1.21 \times 10^{-3}$ | 0.613   | 68.47 {0.888}                                   | 0.692 {0.0}   | $2.10 \times 10^{-2}$ |
| 0.078                | 12.46 {0.006}                                   | 60.98 {0.0}   | $1.29 \times 10^{-3}$ | 0.638   | 91.77 {0.872}                                   | 0.465 {0.0}   | $2.31 \times 10^{-2}$ |
| 0.084                | 12.99 {0.036}                                   | 48.64 {0.048} | $1.41 \times 10^{-3}$ | 0.663   | 132.7 {—}                                       | 0.295 {—}     | $2.54 \times 10^{-2}$ |
| 0.092                | 13.46 {0.022}                                   | 40.75 {0.896} | $1.57 \times 10^{-3}$ |         |                                                 |               |                       |

**Table 3** Pressure-varying Langmuir parameters and estimation for the maximum adsorption capacity,  $N_{L,\infty}(p)$  cost function,  $C(p, b_l(p), \mu)$  at each relative pressure for N<sub>2</sub> adsorption on LiChrospher Si-1000 (LiC).<sup>3</sup> Within each curly brace is the Bayesian Change Point (BCP) probabilities for each maximum adsorption capacity,  $N_{L,\infty}(p)$  and Langmuir equilibrium adsorption coefficient,  $K_L(p)$ .

| $p/p_s$              | $N_{L,\infty}(p)$<br>( $\mu\text{mol m}^{-2}$ ) | $K_L(p)$      | $C(p, b_l(p), \mu)$   | $p/p_s$ | $N_{L,\infty}(p)$<br>( $\mu\text{mol m}^{-2}$ ) | $K_L(p)$      | $C(p, b_l(p), \mu)$   |
|----------------------|-------------------------------------------------|---------------|-----------------------|---------|-------------------------------------------------|---------------|-----------------------|
| $2.9 \times 10^{-4}$ | 4.652 {0.0}                                     | 9452 {0.006}  | $1.70 \times 10^{-5}$ | 0.050   | 12.00 {0.112}                                   | 79.03 {0.0}   | $8.37 \times 10^{-4}$ |
| $3.5 \times 10^{-4}$ | 4.816 {0.0}                                     | 8146 {0.01}   | $1.93 \times 10^{-5}$ | 0.058   | 12.32 {0.616}                                   | 68.66 {0.0}   | $9.85 \times 10^{-4}$ |
| $4.2 \times 10^{-4}$ | 4.987 {0.0}                                     | 6995 {0.0}    | $2.21 \times 10^{-5}$ | 0.068   | 13.05 {0.018}                                   | 51.99 {0.0}   | $1.14 \times 10^{-3}$ |
| $5.1 \times 10^{-4}$ | 5.130 {0.0}                                     | 6138 {0.016}  | $2.53 \times 10^{-5}$ | 0.079   | 13.56 {0.048}                                   | 43.26 {0.0}   | $1.30 \times 10^{-3}$ |
| $6.1 \times 10^{-4}$ | 5.280 {0.0}                                     | 5365 {0.024}  | $2.86 \times 10^{-5}$ | 0.091   | 14.07 {0.004}                                   | 36.52 {0.152} | $1.51 \times 10^{-3}$ |
| $7.3 \times 10^{-4}$ | 5.469 {0.0}                                     | 4563 {0.41}   | $3.22 \times 10^{-5}$ | 0.105   | 14.64 {0.016}                                   | 30.50 {0.69}  | $1.81 \times 10^{-3}$ |
| $8.6 \times 10^{-4}$ | 5.592 {0.0}                                     | 4087 {0.232}  | $3.61 \times 10^{-5}$ | 0.120   | 15.11 {0.006}                                   | 26.44 {0.174} | $2.10 \times 10^{-3}$ |
| $1.0 \times 10^{-3}$ | 5.762 {0.0}                                     | 3536 {0.108}  | $4.05 \times 10^{-5}$ | 0.137   | 15.78 {0.0}                                     | 22.04 {0.004} | $2.41 \times 10^{-3}$ |
| $1.2 \times 10^{-3}$ | 5.899 {0.0}                                     | 3140 {0.186}  | $4.53 \times 10^{-5}$ | 0.155   | 16.38 {0.0}                                     | 18.91 {0.002} | $2.72 \times 10^{-3}$ |
| $1.4 \times 10^{-3}$ | 6.040 {0.0544}                                  | 2786 {0.002}  | $5.04 \times 10^{-5}$ | 0.174   | 16.94 {0.002}                                   | 16.53 {0.086} | $3.06 \times 10^{-3}$ |
| $1.6 \times 10^{-3}$ | 6.192 {0.0}                                     | 2454 {0.178}  | $5.63 \times 10^{-5}$ | 0.195   | 17.49 {0.0}                                     | 14.59 {0.006} | $3.46 \times 10^{-3}$ |
| $1.8 \times 10^{-3}$ | 6.378 {0.458}                                   | 2115 {0.096}  | $6.29 \times 10^{-5}$ | 0.218   | 18.40 {0.0}                                     | 12.06 {0.004} | $4.05 \times 10^{-3}$ |
| $2.1 \times 10^{-3}$ | 6.530 {0.0}                                     | 1873 {0.052}  | $7.05 \times 10^{-5}$ | 0.241   | 19.30 {0.0}                                     | 10.18 {0.008} | $4.66 \times 10^{-3}$ |
| $2.3 \times 10^{-3}$ | 6.684 {0.0}                                     | 1662 {0.274}  | $7.83 \times 10^{-5}$ | 0.264   | 20.16 {0.0}                                     | 8.783 {0.004} | $5.26 \times 10^{-3}$ |
| $2.6 \times 10^{-3}$ | 6.796 {0.0}                                     | 1522 {0.096}  | $8.62 \times 10^{-5}$ | 0.288   | 21.09 {0.002}                                   | 7.587 {0.0}   | $5.91 \times 10^{-3}$ |
| $3.0 \times 10^{-3}$ | 6.923 {0.0}                                     | 1378 {0.192}  | $9.48 \times 10^{-5}$ | 0.313   | 22.08 {0.808}                                   | 6.578 {0.004} | $6.63 \times 10^{-3}$ |
| $3.3 \times 10^{-3}$ | 7.086 {0.0}                                     | 1220 {0.016}  | $1.04 \times 10^{-4}$ | 0.338   | 23.36 {0.152}                                   | 5.578 {0.004} | $7.44 \times 10^{-3}$ |
| $3.7 \times 10^{-3}$ | 7.184 {0.0}                                     | 1131 {0.132}  | $1.13 \times 10^{-4}$ | 0.363   | 24.79 {0.042}                                   | 4.730 {0.004} | $8.31 \times 10^{-3}$ |
| $4.2 \times 10^{-3}$ | 7.327 {0.002}                                   | 1019 {0.13}   | $1.23 \times 10^{-4}$ | 0.388   | 26.37 {0.008}                                   | 4.042 {0.004} | $9.23 \times 10^{-3}$ |
| $4.6 \times 10^{-3}$ | 7.513 {0.0}                                     | 892.0 {0.014} | $1.33 \times 10^{-4}$ | 0.413   | 28.22 {0.07}                                    | 3.405 {0.022} | $1.02 \times 10^{-2}$ |
| $5.1 \times 10^{-3}$ | 7.623 {0.0}                                     | 824.2 {0.096} | $1.45 \times 10^{-4}$ | 0.438   | 30.16 {0.384}                                   | 2.916 {0.032} | $1.12 \times 10^{-2}$ |
| $5.7 \times 10^{-3}$ | 7.803 {0.002}                                   | 728.6 {0.004} | $1.59 \times 10^{-4}$ | 0.463   | 32.45 {0.382}                                   | 2.485 {0.032} | $1.23 \times 10^{-2}$ |
| $6.2 \times 10^{-3}$ | 7.930 {0.0}                                     | 668.2 {0.004} | $1.73 \times 10^{-4}$ | 0.488   | 35.08 {0.278}                                   | 2.113 {0.032} | $1.34 \times 10^{-2}$ |
| $6.9 \times 10^{-3}$ | 8.084 {0.0}                                     | 602.9 {0.0}   | $1.90 \times 10^{-4}$ | 0.513   | 38.24 {0.336}                                   | 1.784 {0.328} | $1.46 \times 10^{-2}$ |
| $7.6 \times 10^{-3}$ | 8.239 {0.0}                                     | 545.3 {0.00}  | $2.05 \times 10^{-4}$ | 0.538   | 42.22 {0.35}                                    | 1.486 {0.002} | $1.58 \times 10^{-2}$ |
| $8.3 \times 10^{-3}$ | 8.411 {0.006}                                   | 489.5 {0.068} | $2.21 \times 10^{-4}$ | 0.563   | 47.09 {0.544}                                   | 1.230 {0.004} | $1.71 \times 10^{-2}$ |
| $9.3 \times 10^{-3}$ | 8.718 {0.0}                                     | 408.3 {0.576} | $2.44 \times 10^{-4}$ | 0.588   | 53.20 {0.488}                                   | 1.008 {0.234} | $1.85 \times 10^{-2}$ |
| 0.011                | 8.960 {0.424}                                   | 356.2 {0.16}  | $2.68 \times 10^{-4}$ | 0.613   | 61.93 {0.694}                                   | 0.798 {0.228} | $2.01 \times 10^{-2}$ |
| 0.012                | 9.104 {0.0}                                     | 327.1 {0.21}  | $2.93 \times 10^{-4}$ | 0.638   | 73.63 {0.454}                                   | 0.623 {0.23}  | $2.17 \times 10^{-2}$ |
| 0.014                | 9.465 {0.534}                                   | 269.9 {0.008} | $3.20 \times 10^{-4}$ | 0.663   | 93.38 {0.976}                                   | 0.453 {0.138} | $2.36 \times 10^{-2}$ |
| 0.016                | 9.755 {0.04}                                    | 231.9 {0.016} | $3.53 \times 10^{-4}$ | 0.688   | 132.8 {1.0}                                     | 0.292 {0.476} | $2.57 \times 10^{-2}$ |
| 0.019                | 9.995 {0.006}                                   | 204.3 {0.0}   | $3.90 \times 10^{-4}$ | 0.712   | 218.5 {1.0}                                     | 0.165 {0.582} | $2.79 \times 10^{-2}$ |
| 0.022                | 10.19 {0.01}                                    | 184.0 {0.0}   | $4.28 \times 10^{-4}$ | 0.736   | 624.0 {1.0}                                     | 0.054 {—}     | $3.02 \times 10^{-2}$ |
| 0.026                | 10.74 {0.002}                                   | 141.4 {0.368} | $4.84 \times 10^{-4}$ | 0.760   | -601.5 {1.0}                                    | -0.051 {—}    | $3.28 \times 10^{-2}$ |
| 0.031                | 11.12 {0.066}                                   | 118.6 {0.254} | $5.47 \times 10^{-4}$ | 0.783   | -186.2 {1.0}                                    | -0.153 {—}    | $3.57 \times 10^{-2}$ |
| 0.036                | 11.44 {0.014}                                   | 101.9 {0.378} | $6.36 \times 10^{-4}$ | 0.805   | -103.2 {—}                                      | -0.251 {—}    | $3.92 \times 10^{-2}$ |
| 0.043                | 11.75 {0.03}                                    | 88.82 {0.0}   | $7.29 \times 10^{-4}$ |         |                                                 |               |                       |

**Table 4** Pressure-varying Langmuir parameters and estimation for the maximum adsorption capacity,  $N_{L,\infty}(p)$  cost function,  $C(p, b_l(p), \mu)$  at each relative pressure for  $N_2$  adsorption on ODMS LiChrospher Si-1000 (ODMS LiC).<sup>4</sup> Within each curly brace is the Bayesian Change Point (BCP) probabilities for each maximum adsorption capacity,  $N_{L,\infty}(p)$  and Langmuir equilibrium adsorption coefficient,  $K_L(p)$ .

| $p/p_s$              | $N_{L,\infty}(p)$<br>( $\mu\text{mol m}^{-2}$ ) | $K_L(p)$      | $C(p, b_l(p), \mu)$   | $p/p_s$ | $N_{L,\infty}(p)$<br>( $\mu\text{mol m}^{-2}$ ) | $K_L(p)$      | $C(p, b_l(p), \mu)$   |
|----------------------|-------------------------------------------------|---------------|-----------------------|---------|-------------------------------------------------|---------------|-----------------------|
| $4.6 \times 10^{-4}$ | 0.968 {0.0}                                     | 1025 {0.278}  | $8.18 \times 10^{-4}$ | 0.105   | 15.46 {0.0}                                     | 11.13 {0.28}  | $5.26 \times 10^{-3}$ |
| $5.6 \times 10^{-4}$ | 1.157 {0.0}                                     | 779.6 {0.004} | $9.54 \times 10^{-4}$ | 0.120   | 16.16 {0.0}                                     | 10.07 {0.128} | $5.62 \times 10^{-3}$ |
| $6.8 \times 10^{-4}$ | 1.297 {0.0}                                     | 655.0 {0.002} | $1.05 \times 10^{-3}$ | 0.136   | 17.03 {0.0}                                     | 8.933 {0.0}   | $6.06 \times 10^{-3}$ |
| $8.0 \times 10^{-4}$ | 1.434 {0.0}                                     | 562.0 {0.0}   | $1.13 \times 10^{-3}$ | 0.153   | 17.69 {0.0}                                     | 8.192 {0.0}   | $6.43 \times 10^{-3}$ |
| $9.4 \times 10^{-4}$ | 1.551 {0.0}                                     | 498.3 {0.002} | $1.19 \times 10^{-3}$ | 0.171   | 18.40 {0.0}                                     | 7.482 {0.0}   | $6.82 \times 10^{-3}$ |
| $1.1 \times 10^{-3}$ | 1.907 {0.002}                                   | 368.2 {0.012} | $1.26 \times 10^{-3}$ | 0.190   | 19.03 {0.0}                                     | 6.935 {0.0}   | $7.27 \times 10^{-3}$ |
| $1.3 \times 10^{-3}$ | 2.169 {0.0}                                     | 304.8 {0.91}  | $1.33 \times 10^{-3}$ | 0.210   | 20.20 {0.0}                                     | 6.045 {0.0}   | $7.93 \times 10^{-3}$ |
| $1.6 \times 10^{-3}$ | 2.389 {0.002}                                   | 264.1 {0.178} | $1.41 \times 10^{-3}$ | 0.230   | 21.49 {0.0}                                     | 5.265 {0.0}   | $8.60 \times 10^{-3}$ |
| $1.9 \times 10^{-3}$ | 2.656 {0.0}                                     | 224.9 {0.004} | $1.52 \times 10^{-3}$ | 0.250   | 22.78 {0.0}                                     | 4.634 {0.0}   | $9.24 \times 10^{-3}$ |
| $2.2 \times 10^{-3}$ | 2.893 {0.0}                                     | 197.7 {0.006} | $1.61 \times 10^{-3}$ | 0.270   | 24.20 {0.0}                                     | 4.078 {0.0}   | $9.91 \times 10^{-3}$ |
| $2.6 \times 10^{-3}$ | 3.102 {0.0}                                     | 177.8 {0.066} | $1.69 \times 10^{-3}$ | 0.291   | 25.43 {0.0}                                     | 3.677 {0.0}   | $1.05 \times 10^{-2}$ |
| $3.0 \times 10^{-3}$ | 3.312 {0.0}                                     | 160.7 {0.006} | $1.76 \times 10^{-3}$ | 0.311   | 26.98 {0.0}                                     | 3.262 {0.002} | $1.12 \times 10^{-2}$ |
| $3.5 \times 10^{-3}$ | 3.503 {0.0}                                     | 147.5 {0.0}   | $1.83 \times 10^{-3}$ | 0.331   | 28.62 {0.138}                                   | 2.902 {0.0}   | $1.19 \times 10^{-2}$ |
| $3.9 \times 10^{-3}$ | 3.708 {0.0}                                     | 135.0 {0.056} | $1.91 \times 10^{-3}$ | 0.351   | 30.13 {0.862}                                   | 2.628 {0.0}   | $1.26 \times 10^{-2}$ |
| $4.5 \times 10^{-3}$ | 4.136 {0.0}                                     | 114.1 {0.002} | $2.01 \times 10^{-3}$ | 0.371   | 32.37 {0.0}                                     | 2.297 {0.0}   | $1.34 \times 10^{-2}$ |
| $5.0 \times 10^{-3}$ | 4.377 {0.0}                                     | 104.5 {0.384} | $2.11 \times 10^{-3}$ | 0.390   | 34.50 {0.0}                                     | 2.045 {0.0}   | $1.41 \times 10^{-2}$ |
| $5.6 \times 10^{-3}$ | 4.715 {0.0}                                     | 93.17 {0.316} | $2.21 \times 10^{-3}$ | 0.410   | 36.90 {0.002}                                   | 1.816 {0.0}   | $1.48 \times 10^{-2}$ |
| $6.2 \times 10^{-3}$ | 4.940 {0.0}                                     | 86.65 {0.104} | $2.29 \times 10^{-3}$ | 0.430   | 39.64 {0.0}                                     | 1.607 {0.0}   | $1.55 \times 10^{-2}$ |
| $6.8 \times 10^{-3}$ | 5.163 {0.0}                                     | 80.86 {0.07}  | $2.37 \times 10^{-3}$ | 0.450   | 42.42 {0.004}                                   | 1.436 {0.0}   | $1.63 \times 10^{-2}$ |
| $7.4 \times 10^{-3}$ | 5.567 {0.0}                                     | 72.01 {0.048} | $2.44 \times 10^{-3}$ | 0.470   | 46.57 {0.948}                                   | 1.235 {0.0}   | $1.72 \times 10^{-2}$ |
| $8.1 \times 10^{-3}$ | 5.710 {0.0}                                     | 69.18 {0.056} | $2.51 \times 10^{-3}$ | 0.490   | 50.06 {0.046}                                   | 1.104 {1.0}   | $1.81 \times 10^{-2}$ |
| $8.8 \times 10^{-3}$ | 6.154 {0.0}                                     | 61.60 {0.008} | $2.58 \times 10^{-3}$ | 0.510   | 55.52 {0.0}                                     | 0.945 {0.0}   | $1.91 \times 10^{-2}$ |
| $9.7 \times 10^{-3}$ | 6.593 {0.0}                                     | 55.36 {0.05}  | $2.65 \times 10^{-3}$ | 0.530   | 62.38 {0.188}                                   | 0.798 {0.0}   | $2.01 \times 10^{-2}$ |
| 0.011                | 6.989 {0.0}                                     | 50.51 {0.0}   | $2.73 \times 10^{-3}$ | 0.550   | 71.02 {0.82}                                    | 0.666 {0.0}   | $2.11 \times 10^{-2}$ |
| 0.012                | 7.296 {0.0}                                     | 47.15 {0.104} | $2.81 \times 10^{-3}$ | 0.570   | 81.72 {0.242}                                   | 0.552 {0.0}   | $2.21 \times 10^{-2}$ |
| 0.014                | 8.185 {0.0}                                     | 39.34 {0.16}  | $2.89 \times 10^{-3}$ | 0.590   | 95.96 {0.772}                                   | 0.449 {0.922} | $2.31 \times 10^{-2}$ |
| 0.016                | 8.547 {1.0}                                     | 36.60 {0.81}  | $2.98 \times 10^{-3}$ | 0.610   | 116.3 {0.488}                                   | 0.354 {0.084} | $2.43 \times 10^{-2}$ |
| 0.019                | 9.427 {0.0}                                     | 31.17 {0.104} | $3.07 \times 10^{-3}$ | 0.630   | 150.7 {1.0}                                     | 0.260 {0.052} | $2.55 \times 10^{-2}$ |
| 0.023                | 9.982 {0.0}                                     | 28.21 {0.002} | $3.18 \times 10^{-3}$ | 0.650   | 225.9 {1.0}                                     | 0.165 {0.97}  | $2.69 \times 10^{-2}$ |
| 0.028                | 10.30 {0.0}                                     | 26.54 {0.0}   | $3.32 \times 10^{-3}$ | 0.670   | 419.6 {1.0}                                     | 0.0844 {—}    | $2.82 \times 10^{-2}$ |
| 0.034                | 10.85 {0.0}                                     | 24.05 {0.0}   | $3.45 \times 10^{-3}$ | 0.690   | 7570 {1.0}                                      | 0.0044 {—}    | $2.97 \times 10^{-2}$ |
| 0.041                | 11.24 {0.0}                                     | 22.35 {0.002} | $3.62 \times 10^{-3}$ | 0.710   | -432.5 {0.48}                                   | -0.0735 {—}   | $3.14 \times 10^{-2}$ |
| 0.048                | 11.61 {0.0}                                     | 20.86 {0.0}   | $3.78 \times 10^{-3}$ | 0.730   | -201.8 {0.764}                                  | -0.149 {—}    | $3.32 \times 10^{-2}$ |
| 0.056                | 11.94 {0.0}                                     | 19.64 {0.0}   | $3.94 \times 10^{-3}$ | 0.751   | -128.7 {0.262}                                  | -0.219 {—}    | $3.53 \times 10^{-2}$ |
| 0.066                | 12.97 {0.0}                                     | 16.47 {0.0}   | $4.17 \times 10^{-3}$ | 0.771   | -92.50 {0.774}                                  | -0.287 {—}    | $3.76 \times 10^{-2}$ |
| 0.078                | 13.72 {0.0}                                     | 14.54 {0.562} | $4.45 \times 10^{-3}$ | 0.791   | -70.02 {0.022}                                  | -0.353 {—}    | $4.03 \times 10^{-2}$ |
| 0.091                | 14.67 {0.0}                                     | 12.52 {0.032} | $4.87 \times 10^{-3}$ | 0.811   | -55.83 {—}                                      | -0.414 {—}    | $4.33 \times 10^{-2}$ |
